# Supplementary material for: Intra-abdominal hypertension and abdominal compartment syndrome in patients admitted to the ICU
Source: PubMed Central journal article supplement (PMC7530150; doi:10.1186/s13613-020-00746-9), 2020-10-01

**Additional file 1: Figure S1**

Intra-abdominal pressure (IAP) distribution at admission

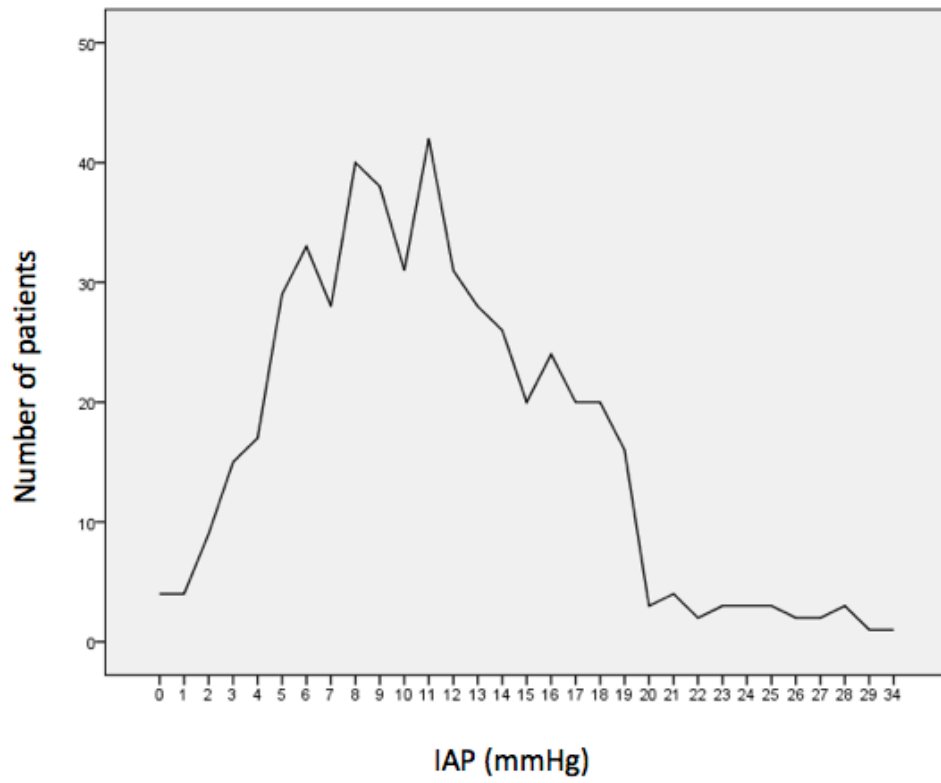

Supplement: 13613_2020_746_MOESM1_ESM.pdf [file 13613_2020_746_MOESM1_ESM.pdf]
